# Supplementary material
Source: Research Square preprint supplement (doi:10.21203/rs.3.rs-10012980/v1)
Supplement: Supplementary file 1 [file d504bb5c9712a43c3e660e58.docx]

|  | | Frequency | Percentage |
| --- | --- | --- | --- |
| Industry sector  (classified by Chinese industry codes) | Electronics and semiconductor industry | 77 | 23.1 |
| Automotive manufacturing | 73 | 21.9 |
| Machinery manufacturing | 67 | 20.1 |
| Pharmaceuticals and medical devices | 54 | 16.2 |
| Home appliances and consumer electronics | 62 | 18.6 |
| Firm age | Shorter than 1 year old | 65 | 19.5 |
| 1 - 5 years old | 68 | 20.4 |
| 6 - 10 years old | 74 | 22.2 |
| 11 - 20 years old | 63 | 18.9 |
| Longer than 20 years old | 63 | 18.9 |
| Firm size  (the number of employees) | Less than 300 | 82 | 24.6 |
| Between 300 to 500 | 88 | 26.4 |
| Between 500 to 1000 | 91 | 27.3 |
| More then 1000 | 72 | 21.6 |
| Investment in AI  (the overall investment within the company in AI-related fields) | < 3 million RMB | 65 | 19.5 |
| 3 - 5 million RMB | 104 | 31.2 |
| 6 - 10 million RMB | 102 | 30.6 |
| > 10 million RMB | 62 | 18.6 |
| ISO 14001 certificate | Yes | 168 | 50.5 |
| No | 165 | 49.5 |
| **Source(s):** **Authors work** | | | |

**Table 1. The sample demographics (N=333)**

**Table 2. Measurement items and validity assessment**

| Variables | Measurement items | Standardized factor loadings | Standardized error |
| --- | --- | --- | --- |
| Overall model fit: χ2/df = 1.259; df = 164; p<0.01; CFI = 0.989; IFI = 0.989; RMSEA = 0.028 | | | |
| AI powered | 1. AI helps our firm optimize low-carbon internal operations. | 0.784 |  |
| 2. AI helps our employees focus on green innovation by automating routine tasks. | 0.773 | 0.064 |
| 3. AI helps our firm make better environmental and sustainability decisions. | 0.756 | 0.065 |
| 4. AI helps our firm plan eco-friendly and sustainable product development. | 0.753 | 0.066 |
| 5. AI helps our firm identify new green and low-carbon market opportunities. | 0.800 | 0.064 |
| 6. AI helps our firm optimize green external processes, such as low-carbon distribution and sustainable sales. | 0.763 | 0.063 |
| Green exploratory | 1. Our firm accepts green demands beyond existing products. | 0.758 |  |
| 2. Our firm pioneers new green products. | 0.778 | 0.075 |
| 3. Experimentation with novel eco-friendly products is common in our local market. | 0.757 | 0.077 |
| 4. Our firm successfully launches entirely new green products to the market. | 0.739 | 0.074 |
| 5. Our firm seizes new opportunities in untapped green markets | 0.776 | 0.076 |
| Green exploitative | 1. Our firm consistently refines eco-friendly provision of existing products. | 0.734 |  |
| 2. Our firm regularly introduces green enhancements to existing products for our local market. | 0.769 | 0.08 |
| 3. Our firm pursues strategies to increase economies of scale in green production. | 0.806 | 0.075 |
| 4. Our firm continuously expands green services for existing clients. | 0.747 | 0.081 |
| Green NPD | 1. The project results, or deliverables, are in line with green new product development objectives. | 0.777 |  |
| 2. This green new product development project is operating within the pre-estimated budget. | 0.792 | 0.066 |
| 3. This green new product development project is operating within the pre-defined schedule. | 0.791 | 0.066 |
| 4. The product quality and deliverables quality of green new product development accord with relevant standards. | 0.798 | 0.068 |
| 5. Overall, our stakeholders are satisfied with the outcomes of the green new product development project. | 0.826 | 0.066 |
| **Note(s):**  1. All standardized factor loadings are significant at 0.01.  **Source(s):** **Authors work** | | | |

**Table 3. Correlation matrix and descriptive statistics**

| Constructs | CR | AVE | Cronbach'α | Mean | SD | 1 | 2 | 3 | 4 |
| --- | --- | --- | --- | --- | --- | --- | --- | --- | --- |
| 1. AI powered | 0.898 | 0.595 | 0.898 | 4.285 | 1.382 |  | .359 | .298 | .329 |
| 2. Green exploratory | 0.874 | 0.580 | 0.873 | 4.811 | 1.442 | .599** |  | .384 | .426 |
| 3. Green exploitative | 0.849 | 0.584 | 0.848 | 4.721 | 1.485 | .546** | .620** |  | .359 |
| 4. Green NPD | 0.897 | 0.635 | 0.897 | 4.767 | 1.531 | .574** | .653** | .599** |  |
| **Note(s):**  1. **is significant at 0.01;  2. CR (Composite Reliability); AVE (Average Variance Extracted); SD (Standard Deviation);  3. Correlations appear below the diagonal, with squared correlations above.  **Source(s):** **Authors work** | | | | | | | | | |

**Table 4. Regression results for mediation analysis**

| **Constructs** | | **Green exploratory** | | | **Green exploitative** | | | | | | **Green NPD** | | | | |
| --- | --- | --- | --- | --- | --- | --- | --- | --- | --- | --- | --- | --- | --- | --- | --- |
|  | Coefficient | | *t-value* | Coefficient | | *t-value* | | | Coefficient | | | | | *t-value* | |
| ***Control variables*** | | | | | | | | | | | | | | | |
| Electronics and semiconductor industry | -.023 | | -.116 | -.217 | | -1.020 | | | .485* | | | | | 2.631 | |
| Automotive manufacturing | -.084 | | -.417 | -.172 | | -.794 | | | .212 | | | | | 1.132 | |
| Machinery manufacturing | .400 | | 1.955 | .251 | | 1.134 | | | .309 | | | | | 1.606 | |
| Home appliances and consumer electronics | .225 | | 1.045 | -.160 | | -.689 | | | .597* | | | | | 2.964 | |
| Firm age < 1 year old | -.037 | | -.177 | -.151 | | -.669 | | | .237 | | | | | 1.215 | |
| Firm age 1-5 years old | -.188 | | -.870 | -.053 | | -.226 | | | .155 | | | | | .769 | |
| Firm age 6-10 years old | -.006 | | -.027 | .027 | | .124 | | | -.055 | | | | | -.291 | |
| Firm age 11-20 years old | .054 | | .263 | .149 | | .667 | | | .208 | | | | | 1.077 | |
| Firm size < 300 employers | .467* | | 2.485 | .102 | | .502 | | | .024 | | | | | .134 | |
| Firm size 300-500 employers | .479* | | 2.533 | .352* | | 1.726 | | | -.027 | | | | | -.150 | |
| Firm size 501-1000 employers | .487** | | 2.639 | .451* | | 2.266 | | | -.143 | | | | | -.820 | |
| Investment in AI < 3 million RMB | -.306 | | -1.463 | -.434* | | -1.924 | | | .030 | | | | | .155 | |
| Investment in AI 3-5 million RMB | -.067 | | -.358 | -.280 | | -1.384 | | | .066 | | | | | .375 | |
| Investment in AI 6-10 million RMB | -.138 | | -.736 | -.306 | | -1.512 | | | .013 | | | | | .075 | |
| ISO 14001 | .023 | | .181 | .079 | | .567 | | | -.006 | | | | | -.052 | |
| ***Predictor*** | | | | | | | | | | | | | | | |
| AI powered | .624*** | | 13.457 | .578*** | | 11.546 | | | .243*** | | | | | 4.296 | |
| ***Mediators*** | | | | | | | | | | | | | | | |
| Green exploratory |  | |  |  | |  | | | .375*** | | | | | 6.495 | |
| Green exploitative |  | |  |  | |  | | | .289*** | | | | | 5.400 | |
|  | | | | | | | | | | | | | | | |
| *R2* | .400 | | | .340 | | | | | | .540 | | | | | |
| F | 13.183*** | | | 10.190*** | | | | | | 20.467*** | | | | | |
|  |  | | |  | | | | 95% Bootstrap confidence intervals | | | | | | | |
|  |  | | |  | | | β | | | | | | LLCI | | ULCI |
| Indirect effect of AI powered on green NPD via green exploratory | | | | | | | | .234*** | | | | .139 | | | .354 |
| Indirect effect of AI powered on green NPD via green exploitative | | | | | | | | .167*** | | | | .093 | | | .258 |
| **Note(s):**  1. N=333, ***p<0.001, **p<0.01, *p<0.05;  2. LLCI (lower level of confidence interval); ULCI (upper level of confidence interval).  **Source(s): Authors work** | | | | | | | | | | | | | | | |
